# Supplementary material for: Label-free Intraoperative Parathyroid Localization With Near-Infrared Autofluorescence Imaging
Source: Oxford University Press journal article supplement (doi:10.1210/jc.2014-2503), 2014-08-22
Supplement: jc-14-2503.pdf [file jc-14-2503.pdf]

## **Supplemental Figure Legend**

**Supplemental Figure 1.** Near-infrared fluorescence spectroscopy detects parathyroid tissue intraoperatively on 110 patients undergoing parathyroidectomy or thyroidectomy. A) Portable fluorescence spectroscopy system comprised of a spectrometer, NIR laser diode, laptop computer, hand-held fiber optic probe. B) Representative fluorescence spectra from patient undergoing thyroidectomy shows highest level of fluorescence in parathyroid.

**Supplemental Figure 2.** Intraoperative near-infrared fluorescence imaging system. A) Surgical cart with fluorescence processing and display (right) and detector with NIR diode laser (left). B) Close up of fluorescence imaging detector with band-pass filter. C) Schematic of fluorescence imaging system for parathyroid detection.

**Supplemental Table 1.** The performance of near-infrared fluorescence spectroscopy in detecting the parathyroid gland compared to visual assessment and histology for excised glands.

**a**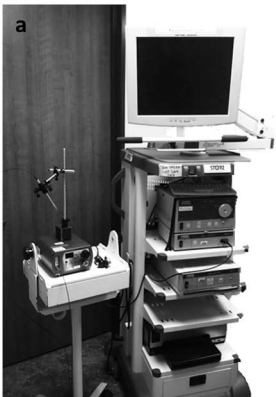**b**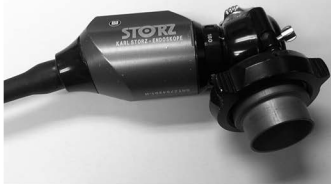**c**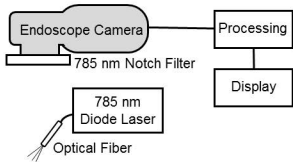

**a**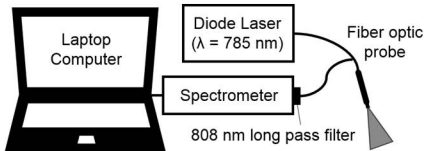**b**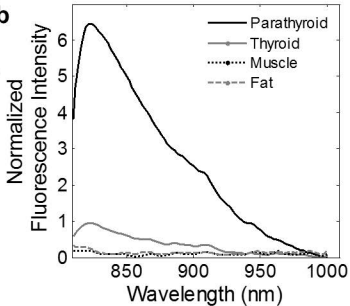

---

| <b>Visual Diagnosis</b> | <b>Surgeon confidence in visual diagnosis (high/medium or low)</b> | <b>High NIR fluorescence signal (Y/N)</b> | <b>Histology</b>   | <b>Number of Measurements</b> |
|-------------------------|--------------------------------------------------------------------|-------------------------------------------|--------------------|-------------------------------|
| Parathyroid             | high/medium                                                        | Y                                         | Parathyroid        | 55                            |
| Parathyroid             | high/medium                                                        | N                                         | Thyroid            | 2                             |
| Parathyroid             | low                                                                | Y                                         | Parathyroid        | 2                             |
| Parathyroid             | low                                                                | N                                         | Thyroid/muscle/fat | 6                             |

---
